# Supplementary material for: Loss of presenilin function enhances tau phosphorylation and aggregation in mice
Source: PubMed Central journal article supplement (PMC8482568; doi:10.1186/s40478-021-01259-7), 2021-09-30
Supplement: 40478_2021_1259_MOESM3_ESM.pdf [file 40478_2021_1259_MOESM3_ESM.pdf]

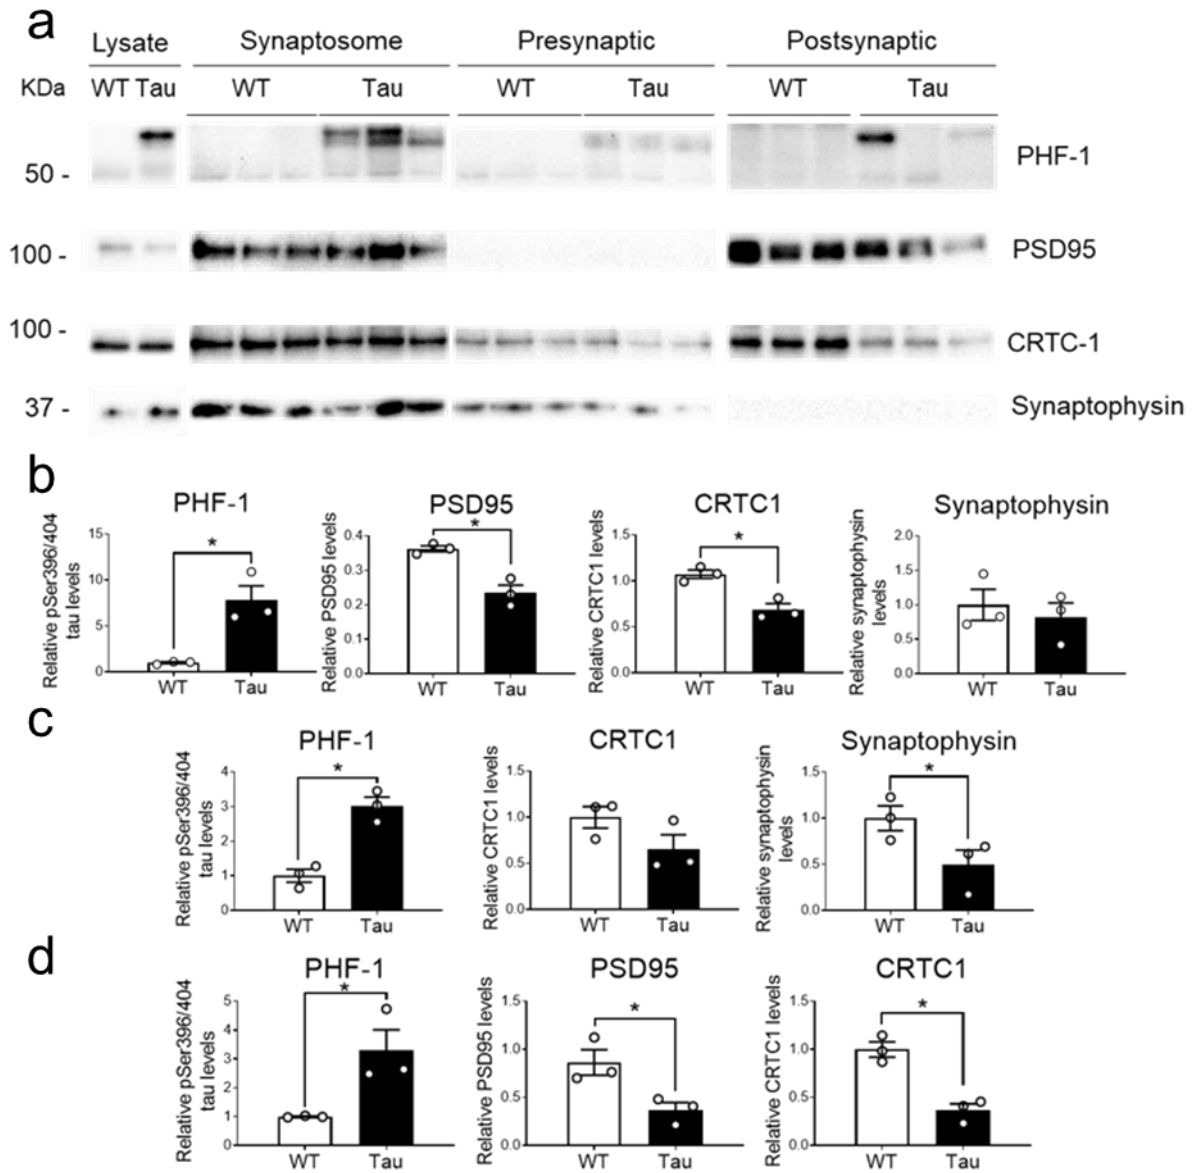

Supplementary Figure 3
